# Supplementary material for: Synthesis of mesoporous and tetragonal zirconia with inherited morphology from metal–organic frameworks
Source: Royal Society of Chemistry journal article supplement (doi:10.1039/c5ce00960j), 2015-01-01
Supplement: c5ce00960j1.pdf [file c5ce00960j1.pdf]

## Synthesis of mesoporous and tetragonal zirconia with inherited morphology from metal-organic frameworks

Xiaoliang Yan, Ningyue Lu, Binbin Fan\*, Jiehua Bao, Dahai Pan, Meijun Wang and  
Ruifeng Li\*

College of Chemistry and Chemical Engineering, Taiyuan University of Technology,  
Taiyuan 030024, China

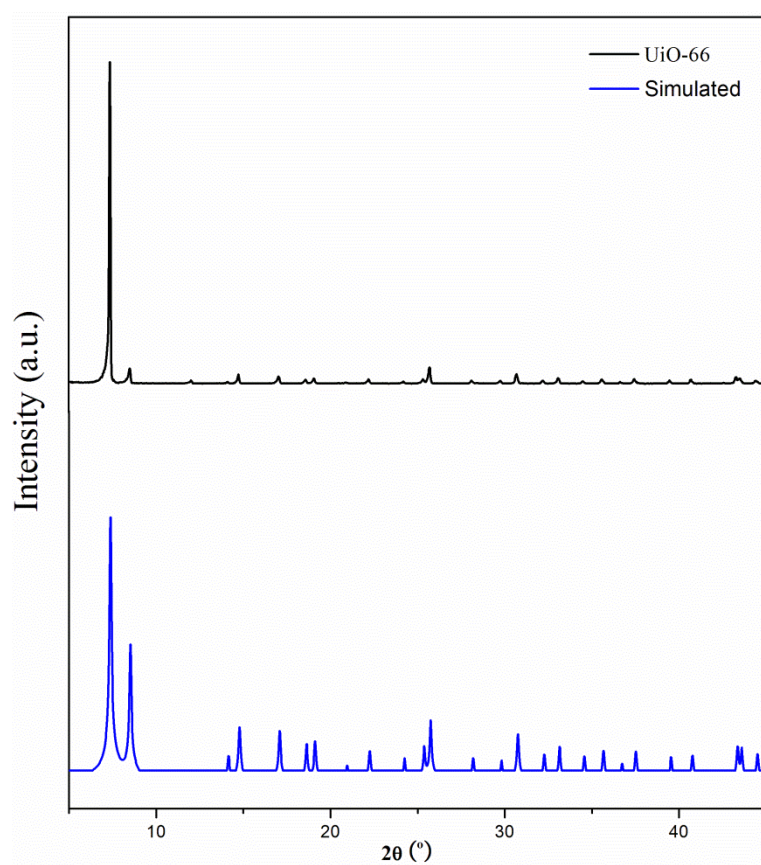

Fig. S1. XRD pattern of UiO-66.

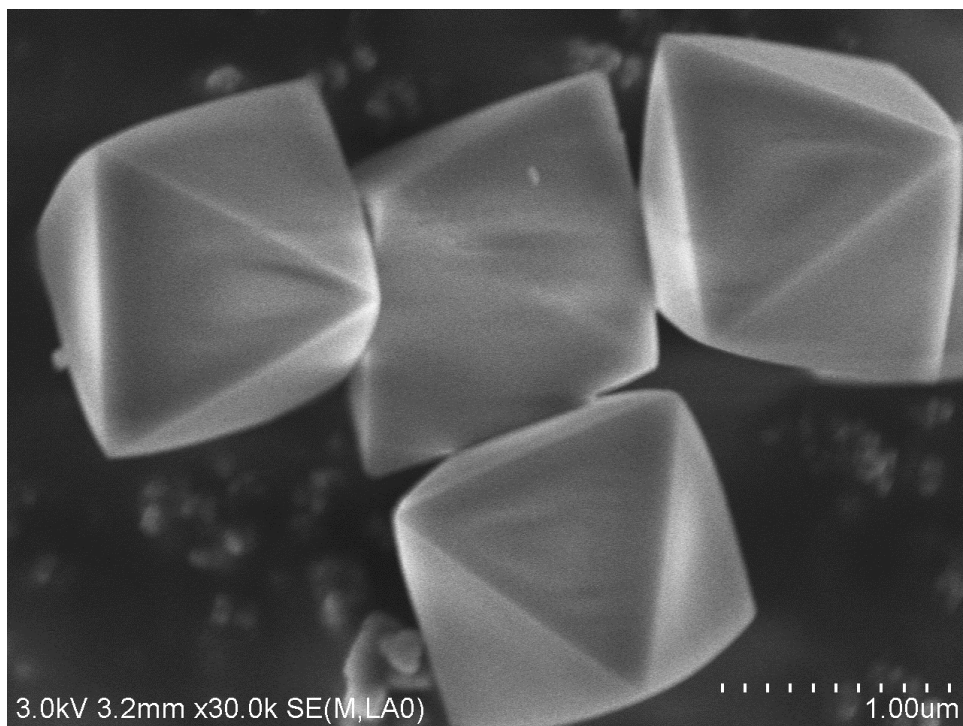

Fig. S2. SEM image of UiO-66.

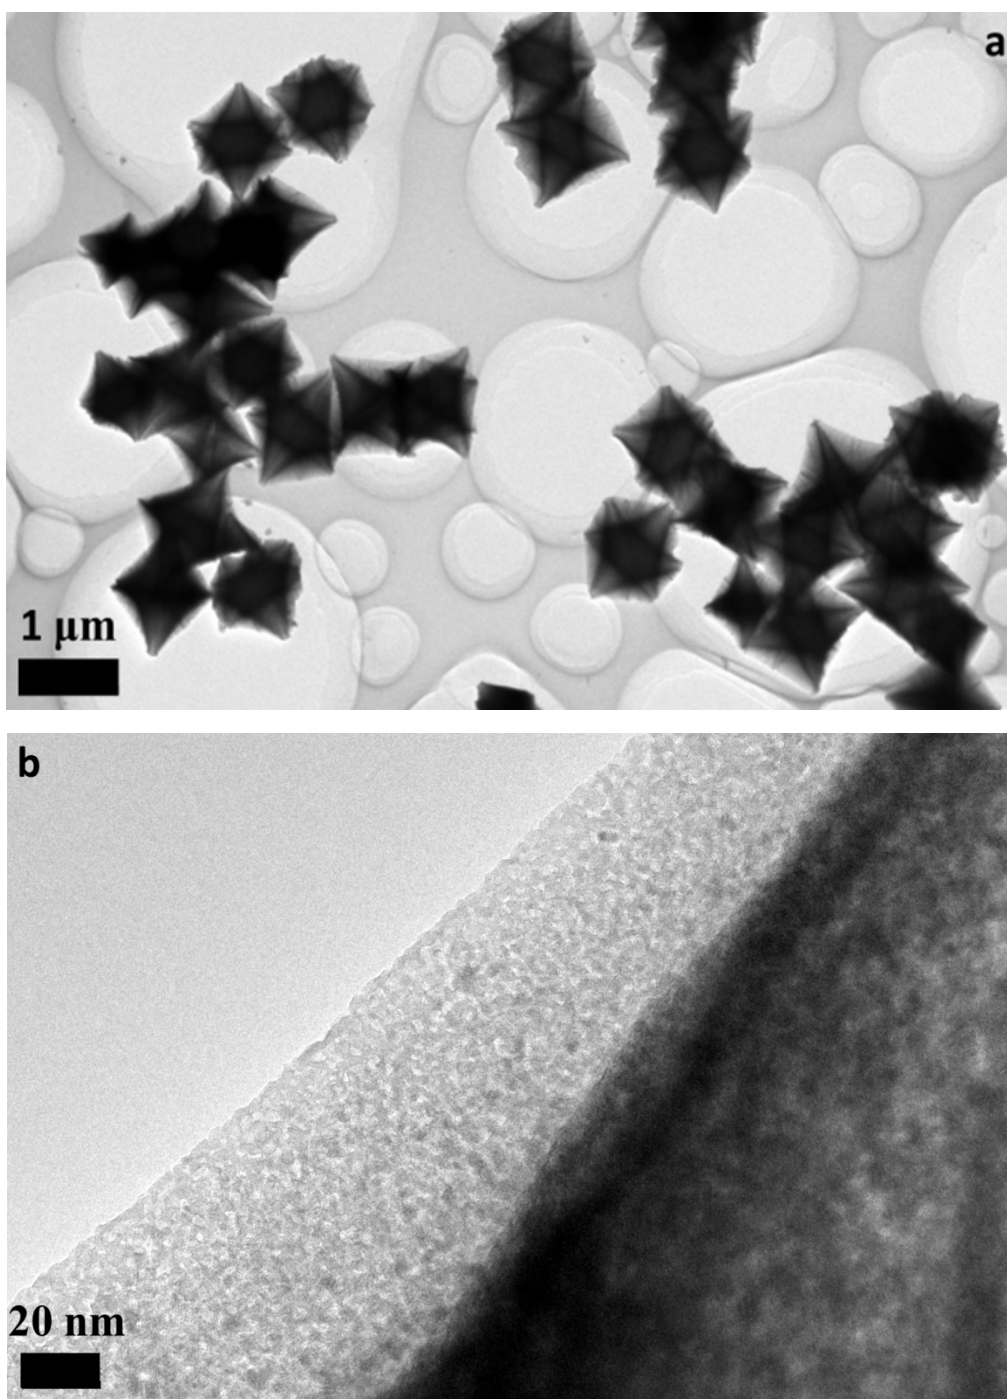

Fig. S3. TEM images of t-ZrO<sub>2</sub>.

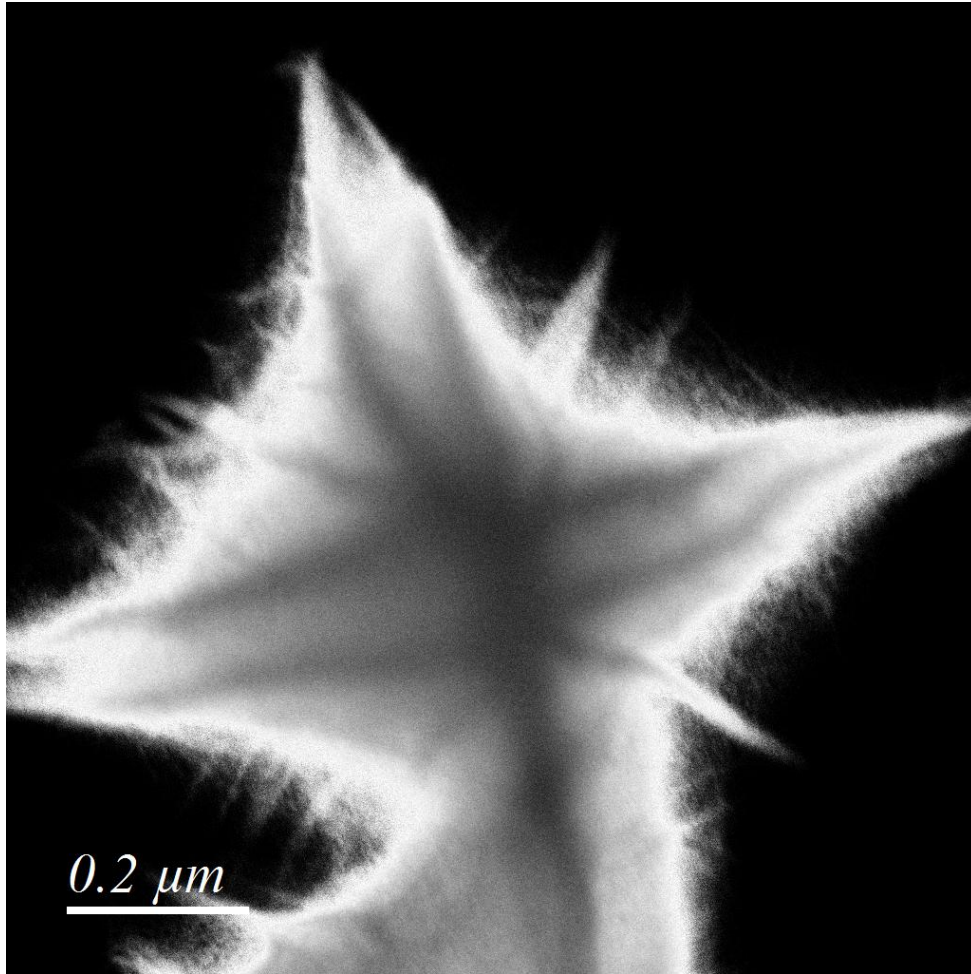

Fig. S4. STEM image of t-ZrO<sub>2</sub>.

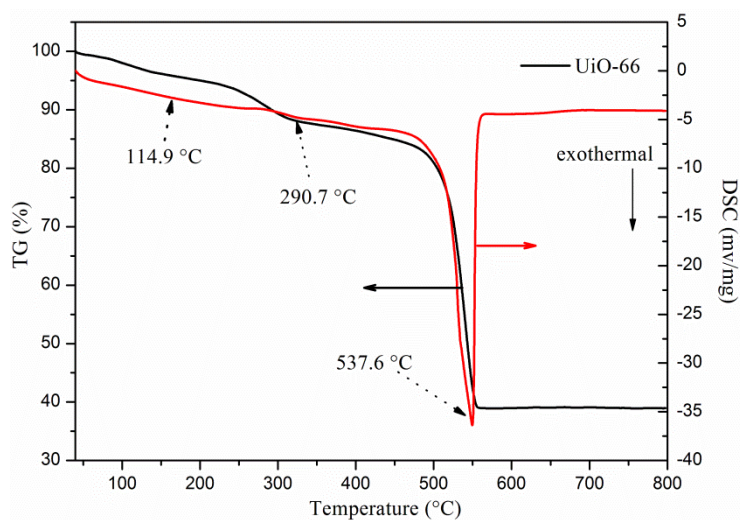

Fig. S5. TGA-DSC analysis of UiO-66.

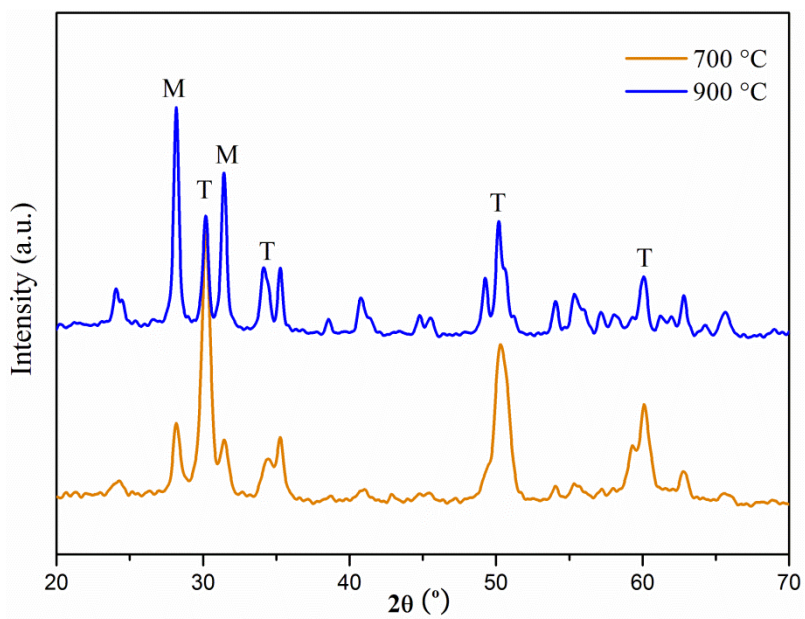

Fig. S6. XRD patterns of zirconia from thermal decomposition of UiO-66 at 700 and 900 °C.

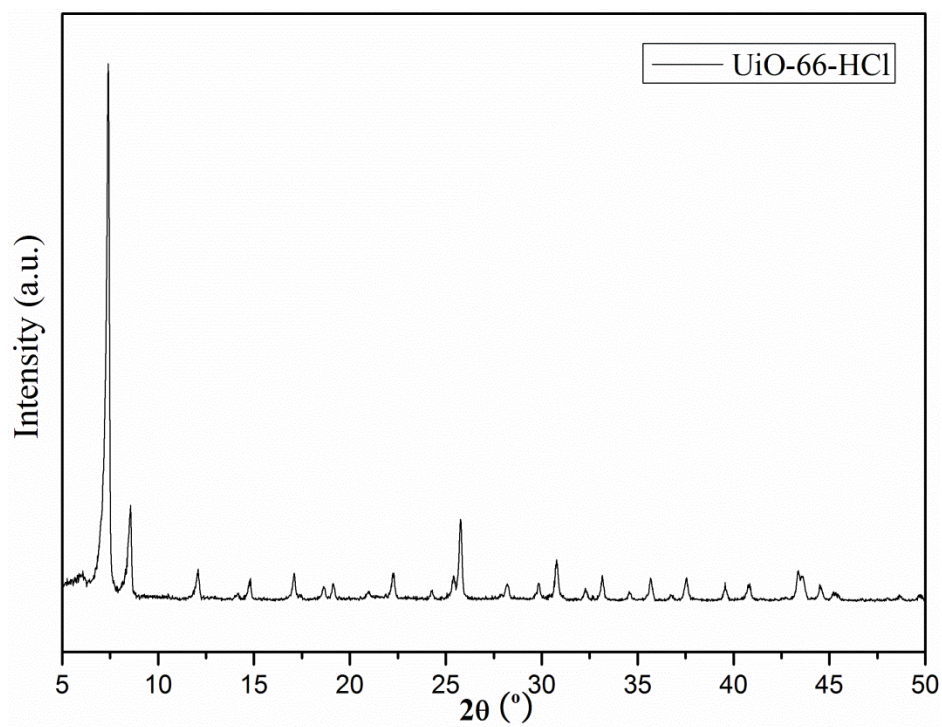

Fig. S7. XRD patterns of UiO-66-HCl.

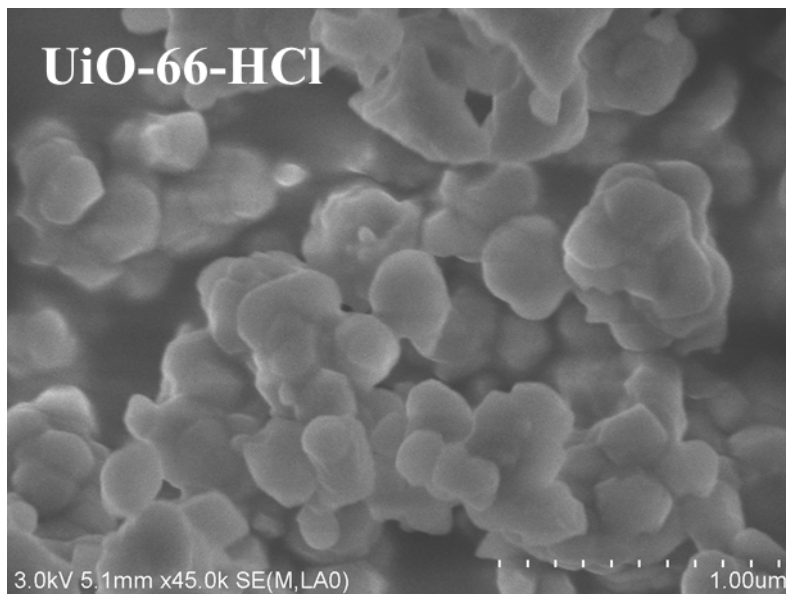

Fig. S8. SEM image of UiO-66-HCl.
